# Supplementary material for: Prevalence and risk factors of hyperuricaemia in non-obese Chinese: a single-centre cross-sectional study
Source: HighWire-hosted journal article supplement (doi:10.1136/bmjopen-2020-048574), 2022-06-01
Supplement: bmjopen-2020-048574supp001_data_supplement.pdf [file bmjopen-2020-048574supp001_data_supplement.pdf]

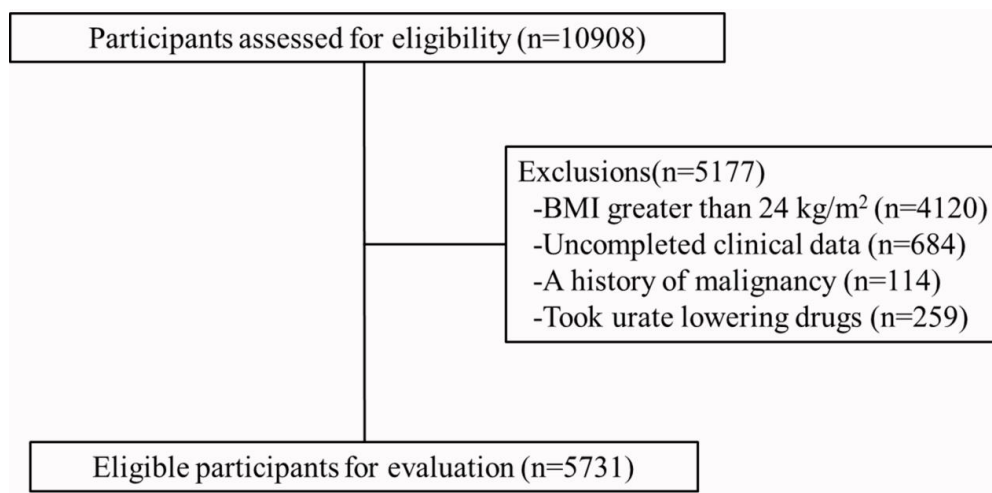

Figure S1. Inclusion and exclusion flow chart of this study
